# Supplementary material for: Serum SARM1 Levels and Diabetic Peripheral Neuropathy in Type 2 Diabetes: Correlation with Clinical Neuropathy Scales and Nerve Conduction Studies and Impact of COVID-19 vaccination
Source: MDPI journal article supplement (doi:10.3390/vaccines12020209), 2024-02-17
Supplement: s1 [file s1]

Table S1. Correlation between SARM1, clinical characteristics and neuropathy scales among the whole cohort and the groups stratified by the number of previous COVID-19 vaccinations. Only correlations achieving  $p < 0.05$  were considered. [Supplementary Tables](#)

| Predictors                          | Groups              | Correlation coefficient | 95% CI          | P-value |
|-------------------------------------|---------------------|-------------------------|-----------------|---------|
| Duration of diabetes                | Whole cohort (n=80) | 0.099                   | -0.072-0.302    | 0.386   |
|                                     | Group A (n=50)      | 0.314                   | 0.037-0.534     | 0.028   |
|                                     | Group B (n=30)      | -0.101                  | -0.521-0.327    | 0.598   |
| MNSI- E (physical examination only) | Whole cohort (n=80) | 0.036                   | -0.194-0.327    | 0.753   |
|                                     | Group A (n=50)      | 0.288                   | -0.015-0.560    | 0.043   |
|                                     | Group B (n=30)      | -0.001                  | 0-0.394-0.419   | 0.997   |
| NSS                                 | Whole cohort (n=80) | -0.013                  | -0.240-0.215    | 0.910   |
|                                     | Group A (n=50)      | 0.327                   | -0.093-0.556    | 0.021   |
|                                     | Group B (n=30)      | 0.176                   | -0.207-0.626    | 0.353   |
| MS AMP                              | Whole cohort (n=80) | -0.205                  | -0.392-0.027    | 0.070   |
|                                     | Group A (n=50)      | -0.336                  | -0.538-(-0.027) | 0.018   |
|                                     | Group B (n=30)      | -0.145                  | -0.572-0.283    | 0.445   |
| US AMP                              | Whole cohort (n=80) | -0.242                  | -0.461-0.024    | 0.031   |
|                                     | Group A (n=50)      | -0.085                  | -0.370-0.200    | 0.557   |
|                                     | Group B (n=30)      | -0.162                  | -0.531-0.180    | 0.391   |

**Abbreviation:** SARM1: sterile-a and Toll/interleukin-1 receptor domain-containing protein 1; DD: duration of diseases; MNSI-E: Michigan Neuropathy Screening Instrument examination; NSS: Neuropathy Symptoms Score; AMP: amplitude; MS: median sensory; US: ulnar sensory; P-value < 0.05.



Table S2. SARM1 level correlation with healthy and diabetic participants with and without neuropathy groups. **Supplementary Tables**

| Model                        | Groups       | OR        | 95% CI      | P-value |
|------------------------------|--------------|-----------|-------------|---------|
| Crude (Unadjusted)           | HP (n=30)    | Reference |             |         |
|                              | T2DM (n=20)  | 1.000     | 0.999-1.001 | 0.945   |
|                              | T2DMN (n=30) | 1.001     | 1.000-1.002 | 0.214   |
| COVID-19 vaccine (Adjusted)  |              |           |             |         |
| A single dose of the vaccine | HP (n=18)    | Reference |             |         |
|                              | T2DM (n=10)  | 1.010     | 0.999-1.021 | 0.088   |
|                              | T2DMN (n=22) | 1.013     | 1.003-1.023 | 0.013   |
| Two doses of the vaccine     | HP (n=12)    | Reference |             |         |
|                              | T2DM (n=10)  | 1.000     | 0.999-1.001 | 0.737   |
|                              | T2DMN (n=8)  | 1.001     | 0.999-1.002 | 0.406   |

Dependent variable: T2DMN (three levels: “HP” “T2DM,” and “T2DMN”). The reference category of the dependent variable was “Healthy participants”. Independent variable: SARM1. The confounder factors were adjusted by the numbers of COVID-19 vaccine doses

COVID-19: coronavirus disease 2019; T2DM: type 2 diabetes mellitus; T2DMN: T2DM with neuropathy;

OR: odds ratio; 95% CI: 95% confidence interval; and HP: healthy participants. P-value < 0.05.

Table S3. SARM1 level correlation with healthy, duration (years)  $\leq 3$ , and Duration (years)  $> 3$ . **Supplementary Tables**

| Model              | Groups | OR        | 95% CI | P-value |
|--------------------|--------|-----------|--------|---------|
| Crude (Unadjusted) | HP     | Reference |        |         |



|                              |                           |           |             |       |
|------------------------------|---------------------------|-----------|-------------|-------|
|                              | Duration (years) $\leq 3$ | 1.000     | 0.998-1.002 | 0.807 |
|                              | Duration (years) $> 3$    | 1.000     | 0.999-1.002 | 0.489 |
| COVID-19 vaccine (Adjusted)  |                           |           |             |       |
| A single dose of the vaccine | HP                        | Reference |             |       |
|                              | Duration (years) $\leq 3$ | 1.016     | 1.003-1.029 | 0.015 |
|                              | Duration (years) $> 3$    | 1.011     | 1.001-1.021 | 0.027 |
| Two doses of the vaccine     | HP                        | Reference |             |       |
|                              | Duration (years) $\leq 3$ | 1.000     | 0.997-1.002 | 0.809 |
|                              | Duration (years) $> 3$    | 1.001     | 0.999-1.001 | 0.721 |

Dependent variable: Duration of T2DM (years)  $> 3$  (three levels: “Healthy participants” “duration of T2DM (years)  $\leq 3$ ,” and “Duration (years)  $> 3$ ”). The reference category of the dependent variable was “HP”,

Independent variable: SARM1. The confounder factors were adjusted by the numbers of COVID-19 vaccine doses

COVID-19: coronavirus disease 2019; OR: odds ratio; 95% CI: 95% confidence interval; and HP: healthy participants. P-value  $< 0.05$ .

**Table S4.** Correlation between SARM1, clinical characteristics, neuropathy scales and NCSs among the whole cohort and the groups stratified by the number of previous COVID-19 vaccinations.

**Supplementary Tables**

| Variables   | Groups              | Spearman's rho | P value | 95% CI |       |
|-------------|---------------------|----------------|---------|--------|-------|
|             |                     |                |         | Lower  | Lower |
| Age (years) | Whole cohort (n=80) | 0.083          | 0.464   | -0.146 | 0.303 |



|                              |                     |        |       |        |       |
|------------------------------|---------------------|--------|-------|--------|-------|
|                              | Group A (n=50)      | 0.156  | 0.280 | -0.136 | 0.423 |
|                              | Group B (n=30)      | 0.082  | 0.667 | -0.297 | 0.438 |
| <b>DV (month)</b>            | Whole cohort (n=80) | -0.028 | 0.802 | -0.253 | 0.199 |
|                              | Group A (n=50)      | -0.215 | 0.133 | -0.472 | 0.076 |
|                              | Group B (n=30)      | 0.307  | 0.099 | -0.071 | 0.608 |
| <b>DD (year)</b>             | Whole cohort (n=80) | 0.099  | 0.386 | -0.132 | 0.319 |
|                              | Group A (n=50)      | 0.314  | 0.028 | 0.028  | 0.553 |
|                              | Group B (n=30)      | -0.101 | 0.596 | -0.454 | 0.280 |
| <b>HbA1c (%)</b>             | Whole cohort (n=80) | 0.094  | 0.409 | -0.135 | 0.313 |
|                              | Group A (n=50)      | 0.267  | 0.061 | -0.021 | 0.514 |
|                              | Group B (n=30)      | -0.100 | 0.598 | -0.453 | 0.280 |
| <b>FBG (mmol/L)</b>          | Whole cohort (n=80) | 0.103  | 0.362 | -0.126 | 0.322 |
|                              | Group A (n=50)      | 0.201  | 0.163 | -0.091 | 0.460 |
|                              | Group B (n=30)      | 0.012  | 0.949 | -0.359 | 0.380 |
| <b>MNSI (n) (sum score)</b>  | Whole cohort (n=80) | -0.022 | 0.848 | -0.247 | 0.205 |
|                              | Group A (n=50)      | 0.240  | 0.093 | -0.049 | 0.493 |
|                              | Group B (n=30)      | 0.132  | 0.486 | -0.250 | 0.479 |
| <b>MNSI-Q (n)</b>            | Whole cohort (n=80) | -0.054 | 0.636 | -0.276 | 0.174 |
|                              | Group A (n=50)      | 0.198  | 0.168 | -0.093 | 0.458 |
|                              | Group B (n=30)      | 0.190  | 0.316 | -0.194 | 0.523 |
| <b>MNSI-E (n)</b>            | Whole cohort (n=80) | 0.036  | 0.753 | -0.192 | 0.260 |
|                              | Group A (n=50)      | 0.288  | 0.043 | 0.002  | 0.530 |
|                              | Group B (n=30)      | 0.001  | 0.997 | -0.369 | 0.371 |
| <b>mTCNS (n) (sum score)</b> | Whole cohort (n=80) | -0.018 | 0.873 | -0.243 | 0.209 |
|                              | Group A (n=50)      | 0.217  | 0.130 | -0.074 | 0.474 |
|                              | Group B (n=30)      | 0.146  | 0.440 | -0.236 | 0.490 |



|                    |                     |        |       |        |        |
|--------------------|---------------------|--------|-------|--------|--------|
| <b>mTCNS-Q (n)</b> | Whole cohort (n=80) | -0.094 | 0.409 | -0.313 | 0.135  |
|                    | Group A (n=50)      | 0.175  | 0.223 | -0.117 | 0.439  |
|                    | Group B (n=30)      | 0.038  | 0.841 | -0.337 | 0.402  |
| <b>mTCNS-E (n)</b> | Whole cohort (n=80) | 0.120  | 0.289 | -0.109 | 0.337  |
|                    | Group A (n=50)      | 0.267  | 0.060 | -0.020 | 0.514  |
|                    | Group B (n=30)      | 0.340  | 0.066 | -0.034 | 0.631  |
| <b>UENS (n)</b>    | Whole cohort (n=80) | 0.108  | 0.342 | -0.121 | 0.326  |
|                    | Group A (n=50)      | 0.231  | 0.107 | -0.059 | 0.485  |
|                    | Group B (n=30)      | 0.333  | 0.072 | -0.042 | 0.626  |
| <b>NSS (n)</b>     | Whole cohort (n=80) | -0.013 | 0.910 | -0.238 | 0.214  |
|                    | Group A (n=50)      | 0.327  | 0.021 | 0.045  | 0.560  |
|                    | Group B (n=30)      | 0.176  | 0.353 | -0.208 | 0.512  |
| <b>NDS (n)</b>     | Whole cohort (n=80) | 0.135  | 0.231 | -0.093 | 0.351  |
|                    | Group A (n=50)      | 0.276  | 0.053 | -0.011 | 0.521  |
|                    | Group B (n=30)      | 0.293  | 0.116 | -0.086 | 0.598  |
| <b>DNS (n)</b>     | Whole cohort (n=80) | -0.077 | 0.497 | -0.298 | 0.152  |
|                    | Group A (n=50)      | 0.212  | 0.140 | -0.079 | 0.469  |
|                    | Group B (n=30)      | 0.037  | 0.846 | -0.338 | 0.401  |
| <b>MS AMP (mV)</b> | Whole cohort (n=80) | -0.214 | 0.057 | -0.419 | 0.013  |
|                    | Group A (n=50)      | -0.328 | 0.020 | -0.562 | -0.047 |
|                    | Group B (n=30)      | -0.145 | 0.445 | -0.489 | 0.238  |
| <b>US AMP (mV)</b> | Whole cohort (n=80) | -0.242 | 0.031 | -0.443 | -0.016 |
|                    | Group A (n=50)      | -0.085 | 0.557 | -0.362 | 0.206  |
|                    | Group B (n=30)      | -0.162 | 0.391 | -0.502 | 0.221  |
| <b>SS AMP (mV)</b> | Whole cohort (n=80) | -0.152 | 0.179 | -0.365 | 0.077  |
|                    | Group A (n=50)      | -0.099 | 0.495 | -0.374 | 0.193  |



|              |                     |        |       |        |       |
|--------------|---------------------|--------|-------|--------|-------|
|              | Group B (n=30)      | -0.035 | 0.853 | -0.400 | 0.339 |
| SPS AMP (mV) | Whole cohort (n=80) | -0.114 | 0.316 | -0.331 | 0.115 |
|              | Group A (n=50)      | -0.069 | 0.635 | -0.348 | 0.222 |
|              | Group B (n=30)      | -0.059 | 0.755 | -0.420 | 0.317 |

**Abbreviation:** CI: Confidence Interval; DD: duration of diseases; FBG: fasting blood glucose; HbA1c: hemoglobin A1c; SARM1: sterile-a and Toll/interleukin-1 receptor domain-containing protein 1; Q: Questionnaire; E: examination; NSS: Neuropathy Symptoms Score; MNSI: Michigan Neuropathy Screening Instrument; mTCNS: Modified Toronto Clinical Neuropathy Score; UENS: Utah Early Neuropathy Scale examination; NDS, neuropathy disability score – examination; AMP: amplitude; MS: median sensory; US: ulnar sensory; SS: sural sensory; SPS: superficial peroneal sensory; mV: millivolt; P-value < 0.05.
